# Supplementary material for: Photothermal therapy for cancer cells using optically tunable Fe2O3@Au hexagonal nanodisks
Source: Royal Society of Chemistry journal article supplement (doi:10.1039/d3ta00294b), 2023-01-01
Supplement: d3ta00294b1.pdf [file d3ta00294b1.pdf]

## Supporting Information

### Photothermal therapy for cancer cells by optically tunable Fe<sub>2</sub>O<sub>3</sub>@Au hexagonal nanodisks

Lin Li<sup>a</sup>, Fenglian Qi<sup>a,b</sup>, Jiong Guo<sup>a</sup>, Jing Fan<sup>a</sup>, Wenxiang Zheng<sup>aa</sup>, Murtaza Ghulam<sup>a</sup>, and Weizhi Wang<sup>a</sup>,  
Zihui Meng<sup>\*,a,c</sup>, Lili Qiu<sup>\*</sup>

<sup>a</sup> School of Chemistry and Chemical Engineering, Beijing Institute of Technology, Beijing 100081, P. R. China.

<sup>b</sup> CAS Key Laboratory of Nanosystem and Hierarchical Fabrication, CAS Center for Excellence in Nanoscience, National Center for Nanoscience and Technology, Beijing 100190, P. R. China.

<sup>c</sup> Yangtze Delta Region Academy of Beijing Institute of Technology, Jiaxing 314019, P. R. China.

E-mail: m\_zihui@yahoo.com

E-mail: qiulili@bit.edu.cn

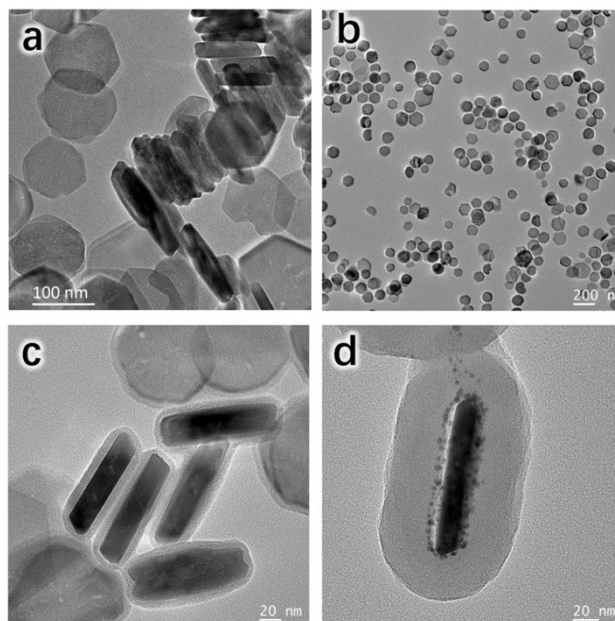

Supplementary Figure 1. TEM images of (a)  $\text{Fe}_2\text{O}_3$ , (b)  $\text{Fe}_2\text{O}_3@\text{SiO}_2$ , and the side of (c)  $\text{Fe}_2\text{O}_3@\text{SiO}_2$ , (d)  $\text{Fe}_2\text{O}_3@\text{void}@Au$  seeds@RF,

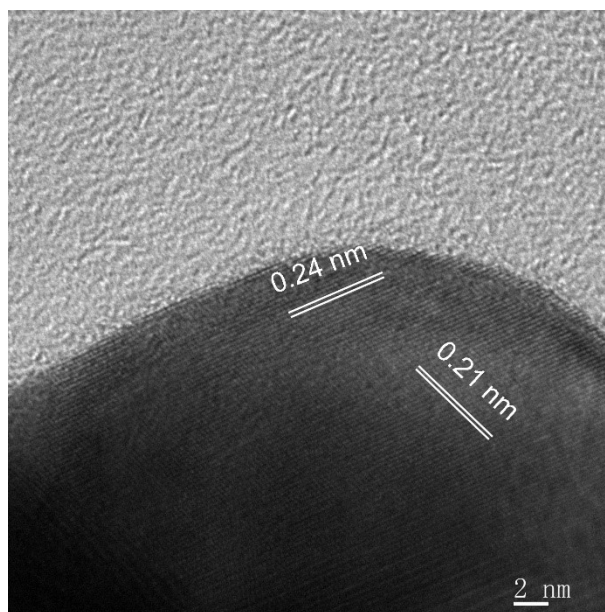

Supplementary Figure 2 HRTEM of 120 nm  $\text{Fe}_2\text{O}_3@Au$  From the HR-TEM image, the lattice spacing is 0.24 nm and 0.21 nm, which correspond to the (111) and (200) crystal planes of Au, respectively.

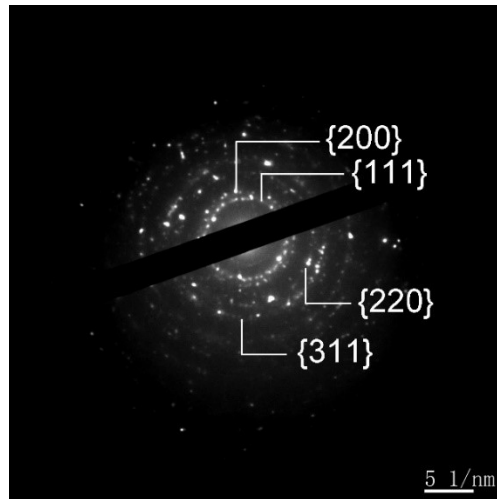

Supplementary Figure 3. SAED pattern of 120 nm  $\text{Fe}_2\text{O}_3@\text{Au}$ . The polycrystalline diffraction rings in the SAED pattern confirmed typical crystal planes of (111), (200), (220), (311) of Au.

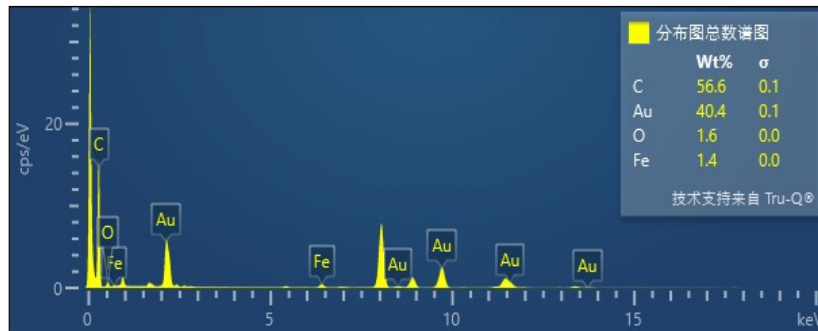

Supplementary Figure 4. Elemental distribution spectrum of 120 nm  $\text{Fe}_2\text{O}_3@\text{Au}@\text{RF}$

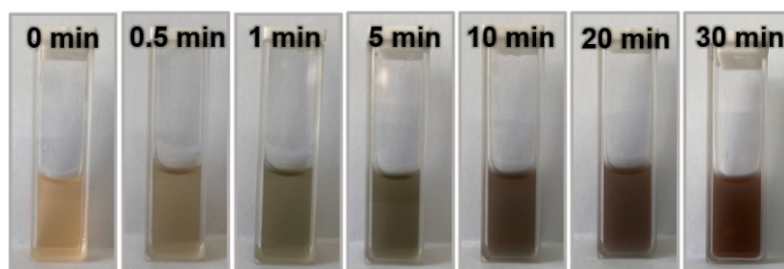

Supplementary Figure 5. The color of reaction solution during the growth of Au nanoshells.

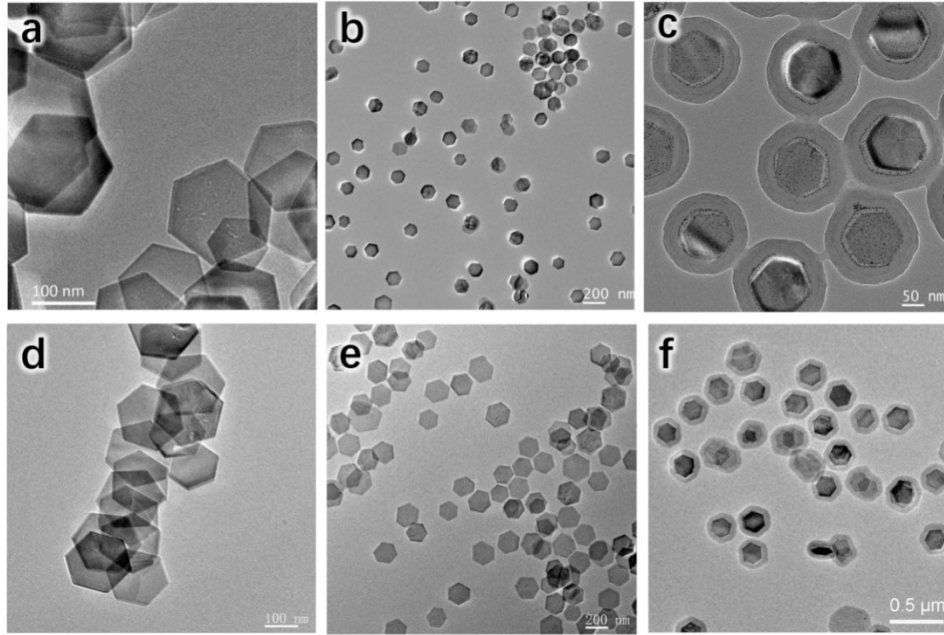

Supplementary Figure 6. TEM images of  $\text{Fe}_2\text{O}_3$  with the size of (a) 160 nm, (d) 210 nm,  $\text{Fe}_2\text{O}_3@\text{SiO}_2$  with the  $\text{Fe}_2\text{O}_3$  size of (b) 160 nm and (e) 210 nm, and  $\text{Fe}_2\text{O}_3@\text{void}@Au$  seeds@RF with the  $\text{Fe}_2\text{O}_3$  size of (c) 160 nm and (f) 210 nm.

Table S1. The specific size of the AuNDs

| diagonal size of $\text{Fe}_2\text{O}_3$ (nm) | size of $\text{Fe}_2\text{O}_3$ (nm) | thickness of $\text{Fe}_2\text{O}_3$ (nm) | of thickness of RF (nm) | of thickness of Au NDs (nm) | of Au diagonal size of Au NDs (nm) |
|-----------------------------------------------|--------------------------------------|-------------------------------------------|-------------------------|-----------------------------|------------------------------------|
| 120                                           | 21                                   | 24                                        | 56                      | 155                         |                                    |
| 160                                           | 19                                   | 23                                        | 67                      | 190                         |                                    |
| 210                                           | 24                                   | 34                                        | 80                      | 265                         |                                    |

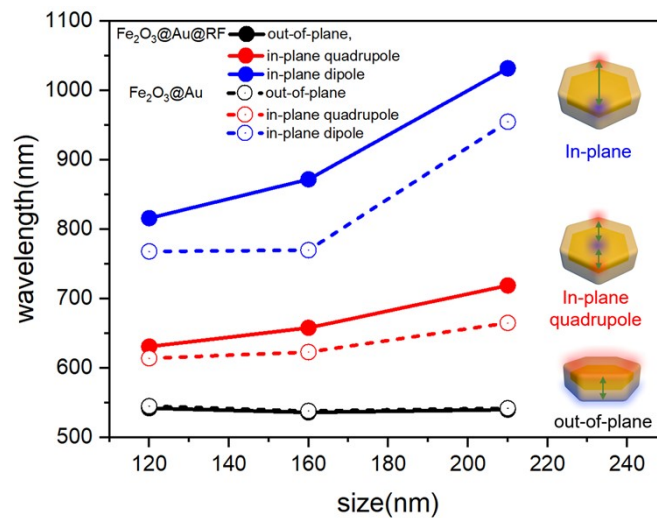

Supplementary Figure 7. The extinction peak positions of different sizes of NDs

Table S2. Summary of the parameters used for the calculation of the heat conversion efficiency.

Were applicable, errors on the last digit are given in parentheses

|                 | $m$ | $C_p$ | $\Delta T$ | $T_s$ | $I$ (W) | $QD$     | $\eta$ |
|-----------------|-----|-------|------------|-------|---------|----------|--------|
| $Fe_2O_3@Au@RF$ | 0.5 | 4.186 | 43.5       | 243   | 1       | 0.337816 | 47%    |
| Water           | 0.5 | 4.186 | 9.8        | 170   | 1       |          |        |

Table S3. The photothermal conversion efficiency of various of materials

| Materials                          | Laser (nm) | Time (min) | Power density ( $W \cdot cm^{-2}$ ) | $\Delta T$ ( $^{\circ}C$ ) | Concentration ( $mg \cdot ml^{-1}$ ) | $\eta$ | Ref.      |
|------------------------------------|------------|------------|-------------------------------------|----------------------------|--------------------------------------|--------|-----------|
| Gold hollow NRs                    | 1064       | 5          | 0.2                                 | 35                         | 0.15                                 | 33%    | 1         |
| Miniature hollow Gold              | 1064       | 10         | 0.7                                 | 17                         | 0.0732                               | 34%    | 2         |
| miniature Au/Ag NRs                | 1064       | 10         | 0.8                                 | 23.2                       | 0.1                                  | 28.8%  | 3         |
| Gold nano-frameworks               | 1064       | 6          | 1                                   | 27.5                       | 0.2                                  | 32.9%  | 4         |
| Gold nanostars                     | 1064       | 5          | 1                                   | 14.3                       | 0.1                                  | 36.4%  | 5         |
| Chitosan-carbon dot                | 808        | 5          | 1.5                                 | 57                         | 0.2                                  | 25.2%  | 6         |
| Carbon Dots                        | 808        | 8          | 1.4                                 | 25                         | 0.02                                 | 30.6%  | 7         |
| Bi@C nanoparticles                 | 1064       | 10         | 1                                   | 25.6                       | 0.4                                  | 43.2%  | 8         |
| $Cu_3BiS_3$                        | 1064       | 6          | 1                                   | 30                         | 0.1                                  | 40.7%  | 9         |
| $Cu_{2-x}S$ nanodots               | 1064       | 5          | 1                                   | 30                         | 0.1                                  | 30.8%  | 10        |
| $Ni_9S_8$ nanoparticles            | 1064       | 10         | 0.7                                 | 20                         | 0.1                                  | 46%    | 11        |
| CuS-Au heterostructures            | 1064       | 5          | 1.5                                 | 40                         | 0.06                                 | 36.5%  | 12        |
| FePS <sub>3</sub> nanosheets       | 1064       | 10         | 2                                   | 25                         | 0.024                                | 43.3%  | 13        |
| Metallic 1T Phase-MoS <sub>2</sub> | 1064       | 5          | 1                                   | 43                         | 0.5                                  | 43.3%  | 14        |
| Er: WSe <sub>2</sub>               | 808        | 10         | 0.6                                 | 42                         | 0.2                                  | 35.2%  | 15        |
| H2a-4T+FBS                         | 808        | 10         | 0.15                                | 42.4                       | 0.008                                | 20.6%  | 16        |
| PDCDT                              | 808        | 6          | 0.3                                 | 40.2                       | 0.2                                  | 44.9%  | 17        |
| SPN                                | 1064       | 10         | 1                                   | 28                         | 0.03                                 | 46%    | 18        |
| L1057 NPs                          | 980        | 8          | 1                                   | 30.3                       | 0.1                                  | 38%    | 19        |
| TMB-F4TCNQ                         | 1064       | 10         | 1                                   | 22.4                       | 0.1                                  | 42.4%  | 20        |
| $Fe_2O_3@Au@RF$                    | 808        | 8          | 1                                   | 43.5                       | 0.1                                  | 47%    | This work |

#### References

- [1] K. Cai, W. Zhang, J. Zhang, H. Li, H. Han, T. Zhai, ACS Appl Mater Interfaces, 10 (2018) 36703-36710.
- [2] K. Cai, W. Zhang, M.F. Foda, X. Li, J. Zhang, Y. Zhong, H. Liang, H. Li, H. Han, T. Zhai, Small, 16 (2020) e2002748.
- [3] Z. Mei, D. Gao, D. Hu, H. Zhou, T. Ma, L. Huang, X. Liu, R. Zheng, H. Zheng, P. Zhao, J. Zhou, Z. Sheng, Biomaterials, 251 (2020) 120092.
- [4] J. Wang, J. Sun, Y. Wang, T. Chou, Q. Zhang, B. Zhang, L. Ren, H. Wang, Adv. Funct. Mater., 30 (2020).
- [5] D. Zhu, M. Lyu, Q. Huang, M. Suo, Y. Liu, W. Jiang, Y. Duo, K. Fan, ACS Appl Mater Interfaces, 12 (2020) 36928-36937.
- [6] H. Wang, S. Mukherjee, J. Yi, P. Banerjee, Q. Chen, S. Zhou, ACS Appl Mater Interfaces, 9

(2017) 18639-18649.

[7] Y. Li, G. Bai, S. Zeng, J. Hao, ACS Appl Mater Interfaces, 11 (2019) 4737-4744.

[8] W. Zhen, S. An, W. Wang, Y. Liu, X. Jia, C. Wang, M. Zhang, X. Jiang, Nanoscale, 11 (2019) 9906-9911.

[9] A. Li, X. Li, X. Yu, W. Li, R. Zhao, X. An, D. Cui, X. Chen, W. Li, Biomaterials, 112 (2017) 164-175.

[10] R. Hu, Y. Fang, M. Huo, H. Yao, C. Wang, Y. Chen, R. Wu, Biomaterials, 206 (2019) 101-114.

[11] Z. Lei, W. Zhang, B. Li, G. Guan, X. Huang, X. Peng, R. Zou, J. Hu, Nanoscale, 11 (2019) 20161-20170.

[12] Z. Wang, N. Yu, X. Li, W. Yu, S. Han, X. Ren, S. Yin, M. Li, Z. Chen, Chem. Eng. J., 381 (2020) 122613.

[13] Q. Zhang, Q. Guo, Q. Chen, X. Zhao, S.J. Pennycook, H. Chen, Adv. Sci. (Weinheim, Ger.), 7 (2020) 1902576.

[14] Z. Zhou, B. Li, C. Shen, D. Wu, H. Fan, J. Zhao, H. Li, Z. Zeng, Z. Luo, L. Ma, C. Tan, Small, 16 (2020) e2004173.

[15] Y. Huang, Y. Zhao, Y. Liu, R. Ye, L. Chen, G. Bai, S. Xu, Chem. Eng. J., 411 (2021) 128610.

[16] X. Zeng, Y. Xiao, J. Lin, S. Li, H. Zhou, J. Nong, G. Xu, H. Wang, F. Xu, J. Wu, Z. Deng, X. Hong, Adv. Healthcare Mater., 7 (2018) e1800589.

[17] Y. Jiang, J. Li, X. Zhen, C. Xie, K. Pu, Adv. Mater., 30 (2018) e1705980.

[18] T. Sun, J. Han, S. Liu, X. Wang, Z.Y. Wang, Z. Xie, ACS Nano, 13 (2019) 7345-7354.

[19] Y. Yang, X. Fan, L. Li, Y. Yang, A. Nuernisha, D. Xue, C. He, J. Qian, Q. Hu, H. Chen, J. Liu, W. Huang, ACS Nano, 14 (2020) 2509-2521.

[20] C. Ou, W. Na, W. Ge, H. Huang, F. Gao, L. Zhong, Y. Zhao, X. Dong, Angew. Chem., Int. Ed. Engl., 60 (2021) 8157-8163.

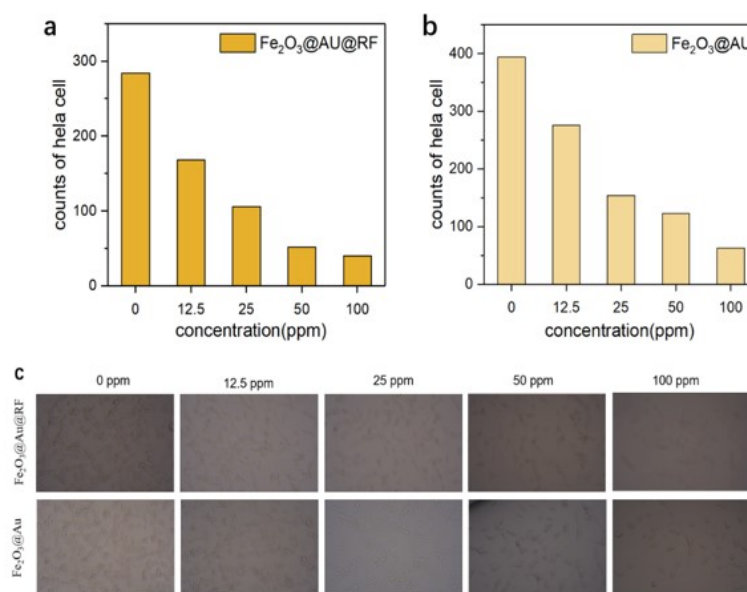

Supplementary Figure 8. Statistics of the number of HeLa cells after adding different concentrations of (a) Fe<sub>2</sub>O<sub>3</sub>@Au@RF and (b) Fe<sub>2</sub>O<sub>3</sub>@Au nanosheets after laser irradiation for

3 min, and (c) the corresponding optical photos of cells ( $\times 10$ )
